# Supplementary material
Source: PubMed Central journal article supplement (PMC2953854)
Supplement: NIHMS232338-supplement-1.pdf [file NIHMS232338-supplement-1.pdf]

**Supplementary Table 1. Signature sites, PNAs, circularizable ODNs, decorator probes and primer used in this work.**

| Bacterium                                  | Signature sites*                                                                                                                                                                                                                                                                   | PNAs**                                                                                                                                                                                                                                                                                                                                                                                                                                            | Decorator Probe/<br>Circularizable Oligonucleotides / Primer***                                                                                                                                                                                                                                                                                                                                                                                                                                |
|--------------------------------------------|------------------------------------------------------------------------------------------------------------------------------------------------------------------------------------------------------------------------------------------------------------------------------------|---------------------------------------------------------------------------------------------------------------------------------------------------------------------------------------------------------------------------------------------------------------------------------------------------------------------------------------------------------------------------------------------------------------------------------------------------|------------------------------------------------------------------------------------------------------------------------------------------------------------------------------------------------------------------------------------------------------------------------------------------------------------------------------------------------------------------------------------------------------------------------------------------------------------------------------------------------|
| <i>S. aureus</i><br>(MSSA and<br>MRSA)     | <p><b>SA-1:</b><br/><u>AAAGAAAAGCAACAGAGGAA</u></p> <p><b>SA-2:</b><br/><u>AGAGGAAGCAGAGCGCAAGGGAAA</u></p> <p><b>SA-3:</b><br/><u>AAAAGAAGAAAGATTCAGAGGAAG</u></p>                                                                                                                | <p><b>PNA1:</b> H-Lys<sub>2</sub>-TTTTTTTT-(eg1)<sub>3</sub>-TTTTCT-Lys-NH<sub>2</sub>;</p> <p><b>PNA2:</b> H-TTJTJTTT-(eg1)<sub>3</sub>-TTCTCTT-Lys-NH<sub>2</sub></p> <p><b>PNA3:</b> H-Lys<sub>2</sub>-TJTJTTJ-(eg1)<sub>3</sub>-CTTCTCT-Lys-NH<sub>2</sub></p> <p><b>PNA4:</b> H-TTJJTTT-(eg1)<sub>3</sub>-TTTCCCTT-Lys-NH<sub>2</sub></p> <p><b>PNA5:</b> H-TTJTJTTTT-(eg1)<sub>3</sub>-TTTTCTTCTT-Lys-NH<sub>2</sub></p> <p><b>PNA3</b></p> | <p><b>RED decorator:</b> 5'-<b>CY3</b>-TCACGGAATGGTTACTTGCACAGC-BIOTIN-3'</p> <p><b>ODN_SA1:</b> 5'-p-aacAAGAGGAA(tcacggaatggttacttgcCAGC)<br/>CAGCAGCC(TCACggaatggttacttgcacagc)AAAGAAAagc-3'</p> <p><b>ODN_SA2:</b> 5'-p-gcgcAAGGGAAA(tcacggaatggttacttgcCAGC)<br/>CAGCAGCC(TCACggaatggttacttgcacagc)AGAGGAAGcaga-3'</p> <p><b>ODN_SA3:</b> 5'-p-attcAGAGGAAG(tcacggaatggttacttgcCAGC)<br/>CAGCAGCC(TCACggaatggttacttgcacagc)AAAAGAAGAAg-3'</p> <p><b>Primer:</b> 5'-GTGAGGCTGCTGGCTG-3'</p> |
| <i>S. aureus</i><br>(MRSA)                 | <p><b>MR-1:</b><br/><u>AAGGAGGATATTGATGAAAAAGA</u></p> <p><b>MR-2:</b><br/><u>GGAAGAAAATATTATTCCAAAGAAAA</u></p>                                                                                                                                                                   | <p><b>PNA6:</b> H-Lys<sub>2</sub>-TTJTJTTT-(eg1)<sub>3</sub>-TCTCTCTT-Lys-NH<sub>2</sub>;</p> <p><b>PNA7:</b> H-Lys-TCTTTTTC-(eg1)<sub>3</sub>-JTJTTTJT-Lys-NH<sub>2</sub></p> <p><b>PNA10:</b> H-Lys<sub>2</sub>-TTJTJTTJ-(eg1)<sub>3</sub>-CCTTCTT-Lys-NH<sub>2</sub>;</p> <p><b>PNA1</b></p>                                                                                                                                                   | <p><b>GREEN decorator:</b> 5'-FITC-CCTCAATCGTCGTCGTGTACTAC- FITC-3'</p> <p><b>ODN_MR1:</b> 5'-p-gatGAAAAAGAttatCAGCCAGCAGCCTCA<br/>(Cctcaatcgctgctgtactac)tattAAGGAGGAtatt-3'</p> <p><b>ODN_MR2:</b> 5'-p-atttccAAAGAAAAttatCAGCCAGCAGCCTCA<br/>(Cctcaatcgctgctgtactac)tattGGAAGAAAaatatta-3'</p>                                                                                                                                                                                              |
| <i>E. coli</i><br>vs<br><i>B. subtilis</i> | <p><b>E. coli rpoN:</b><br/>(PNA polymerase sigma N factor region)<br/><u>GAAAGAAGATGTGCTGAAAGAAG</u></p>                                                                                                                                                                          | <p><b>PNA8:</b> H-Lys<sub>2</sub>-JTJTTTJTTJ-(eg1)<sub>3</sub>-CTTCTTTC-Lys-NH<sub>2</sub></p>                                                                                                                                                                                                                                                                                                                                                    | <p><b>ODN_rpoN1:</b> 5'-p-gctGAAAGAAG(tcacggaatggttacttgcCAGC)<br/>CAGCAGCC(TCACggaatggttacttgcacagc)GAAAGAAGatgt-3'</p> <p><b>ODN_rpoN2:</b> 5'-p-gctAAAAGAAG(tcacggaatggttacttgcCAGC)<br/>CAGCAGCC(TCACggaatggttacttgcacagc)GAAAGAAGatgt-3'</p> <p><b>RED</b></p>                                                                                                                                                                                                                            |
|                                            | <p><b>B. subtilis:</b><br/><u>GAAAGAAGATGTaCTaAAAGAAG</u></p>                                                                                                                                                                                                                      | <p><b>PNA8</b></p> <p><b>PNA9:</b> H-Lys<sub>2</sub>-TTTTJTTJ-(eg1)<sub>3</sub>-CTTCTTTC-Lys-NH<sub>2</sub></p>                                                                                                                                                                                                                                                                                                                                   | <p><b>ODN_rpoN3:</b> 5'-p-aCTaAAAGAAGttatCAGCCAGCAGCCTCA<br/>(Cctcaatcgctgctgtactac)tattGAAAGAAGatgt-3'</p> <p><b>GREEN</b></p>                                                                                                                                                                                                                                                                                                                                                                |
| <i>B. subtilis</i>                         | <p><b>serA:</b><br/><u>GAAAAGAAACCCTTCAGAGGAAG</u></p> <p><b>yxjA:</b><br/><u>GGAAGAAGCGCACTAAAGAAAA</u></p>                                                                                                                                                                       | <p><b>PNA11:</b> H-Lys<sub>3</sub>-JTJTTTJTTT-(eg1)<sub>3</sub>-TTCTTTC-Lys-NH<sub>2</sub></p> <p><b>PNA3</b></p> <p><b>PNA12:</b> H-Lys<sub>2</sub>-JJTTJTTJ-(eg1)<sub>3</sub>-CTTCTTCC-Lys-NH<sub>2</sub></p> <p><b>PNA1</b></p>                                                                                                                                                                                                                | <p><b>ODN_serA:</b> 5'-p-ttcAGAGGAAGttatCAGCCAGCAGCCTCA<br/>(Cctcaatcgctgctgtactac)tattGAAAAGAAAacc-3'</p> <p><b>ODN_yxjA:</b> 5'-p-cactAAAGAAAAagtCAGCCAGCAGCCTCA<br/>(Cctcaatcgctgctgtactac)taattGGAAGAAGcgc-3'</p> <p><b>GREEN</b></p>                                                                                                                                                                                                                                                      |
| <i>P. aeruginosa</i>                       | <p><b>PA-popB:</b><br/><u>GGAAGAAGCCGCGAAAGAAG</u><br/>(translocator protein popB gene)</p> <p><b>PA-clp:</b><br/><u>AAAGAAAAGCGAGCGAGAAGAG</u><br/>(clp protease gene region)</p> <p><b>PA-MgtC:</b><br/><u>GAGGGAAGGGACACGAAGGGAAA</u><br/>(MgtC magnesium transporter gene)</p> | <p><b>PNA12</b></p> <p><b>PNA8</b></p> <p><b>PNA1</b></p> <p><b>PNA13:</b> H-Lys<sub>2</sub>-JTJTTJTTJ-(eg1)<sub>3</sub>-CTTCTCTC-Lys-NH<sub>2</sub></p> <p><b>PNA14:</b> H-Lys<sub>2</sub>-JTJTTJTTJ-(eg1)<sub>3</sub>-CTTCCCTC-Lys-NH<sub>2</sub></p> <p><b>PNA4</b></p>                                                                                                                                                                        | <p><b>ODN_popB:</b> 5'-p-gcGAAAGAAG(tcacggaatggttacttgcCAGC)<br/>CAGCAGCC(TCACggaatggttacttgcacagc)GGAAGAAGcc-3'</p> <p><b>ODN_clp:</b> 5'-p-agcGAGAAGAG(tcacggaatggttacttgcCAGC)<br/>CAGCAGCC(TCACggaatggttacttgcacagc)AAAGAAAagcg-3'</p> <p><b>ODN_MgtC:</b> 5'-p-acgAAGGGAAA(tcacggaatggttacttgcCAGC)<br/>CAGCAGCC(TCACggaatggttacttgcacagc)GAGGGAAGggac-3'</p> <p><b>RED</b></p>                                                                                                           |

\* underlined are PNA binding site; \*\*for PNA notations see ref.11;

\*\*\* In circularizable probe sequences: capitalized and underlined are primer annealing sites; capitalized not underlined are sequences identical to PNA binding sites; in (...) are sites for decorator probe's hybridization.
